# Supplementary material for: Molecular docking and antibacterial activity of a one-pot synthesized novel polyaniline substituted imidazole (PANI–imidazole) copolymer
Source: Royal Society of Chemistry journal article supplement (doi:10.1039/d4nj04331f), 2025-01-01
Supplement: d4nj04331f1.pdf [file d4nj04331f1.pdf]

## **Molecular Docking and Antibacterial Activity of One-Pot Synthesized Novel Polyaniline Substituted Imidazole (PANI-Imidazole) Copolymer**

**Chetna Kumari<sup>1</sup>, Amrita Singh<sup>2</sup>, Nirmala Kumari Jangid<sup>1\*</sup>, Jaya Dwivedi<sup>1</sup>, Swapnil Sharma<sup>3</sup>**

<sup>1</sup>*Department of Chemistry, Banasthali Vidyapith, Banasthali – 304022, Rajasthan, India*

<sup>2</sup>*Department of Physical Sciences, Banasthali Vidyapith, Banasthali – 304022, Rajasthan, India*

<sup>3</sup>*Department of Pharmacy, Banasthali Vidyapith, Banasthali – 304022, Rajasthan, India*

\*Corresponding author: [nirmalakumari@banasthali.in](mailto:nirmalakumari@banasthali.in)  
[nirmalajangid.111@gmail.com](mailto:nirmalajangid.111@gmail.com)

**\*Corresponding Author:**

**Dr. Nirmala Kumari Jangid**

Assistant Professor,

Department of Chemistry,

Banasthali Vidyapith

Banasthali – 304022,

Rajasthan, India

**Email Id -** [nirmalajangid.111@gmail.com](mailto:nirmalajangid.111@gmail.com)

[nirmalakumari@banasthali.in](mailto:nirmalakumari@banasthali.in)

**ORCID ID:** <https://orcid.org/0000-0002-3594-7742>

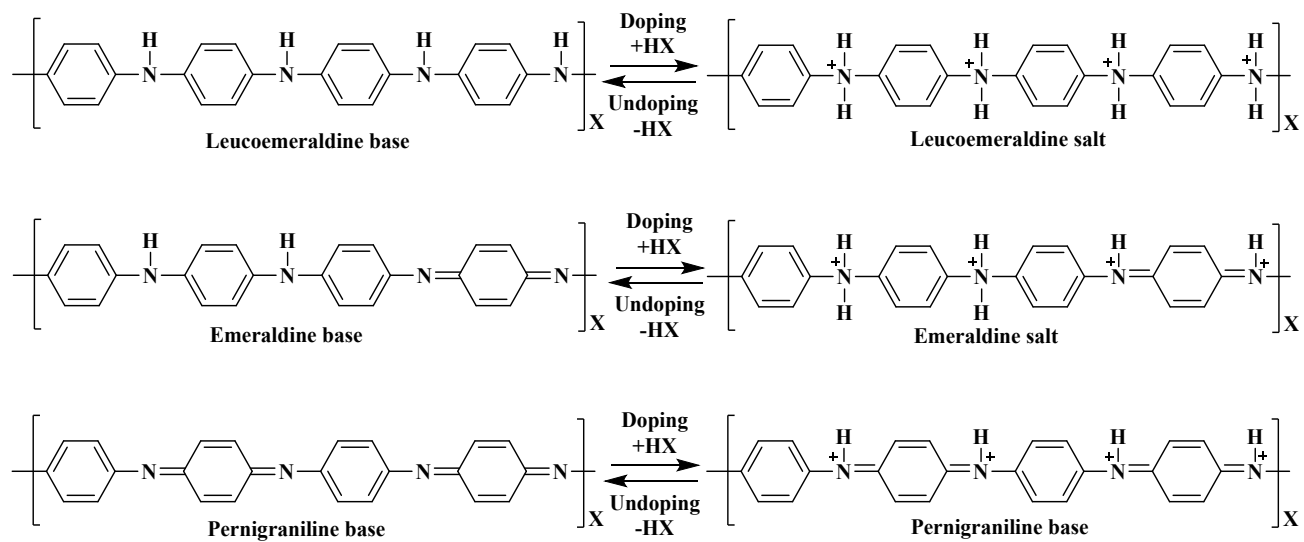

**Figure S1:** Various redox structures of polyaniline

**(a) Step 1 - Oxidation of monomer**

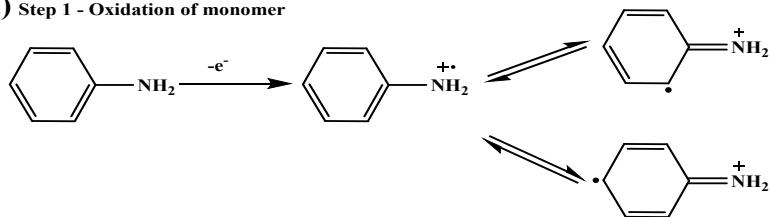

**Step 2 - Radical coupling and rearomatization**

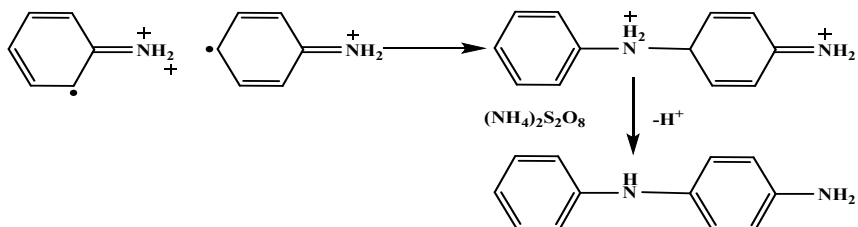

**Step 3 - Chain propagation**

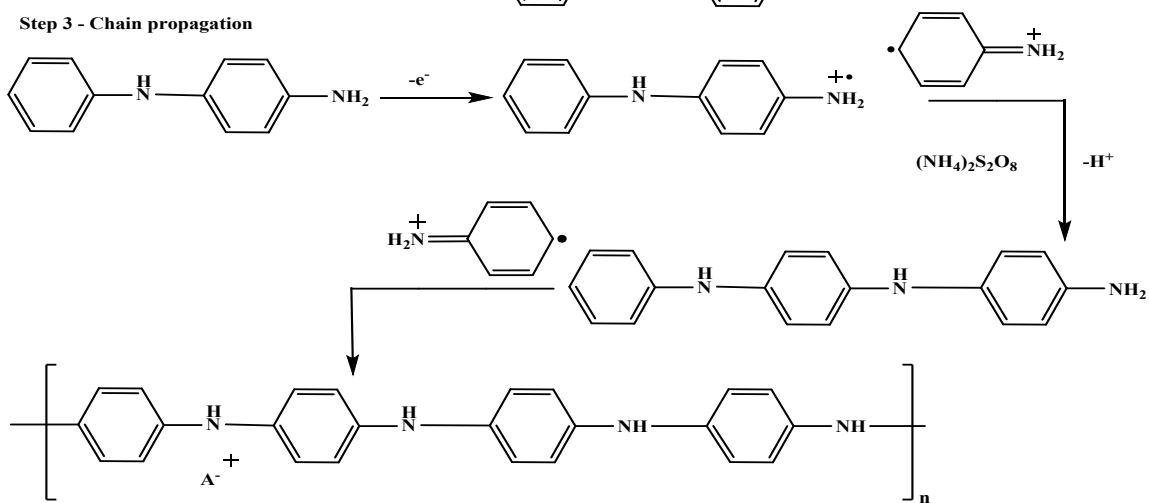

**Emeraldine Salt (ES)**

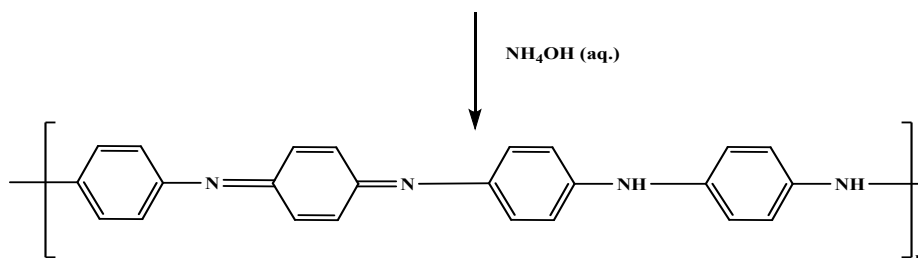

**Emeraldine Base (EB)**

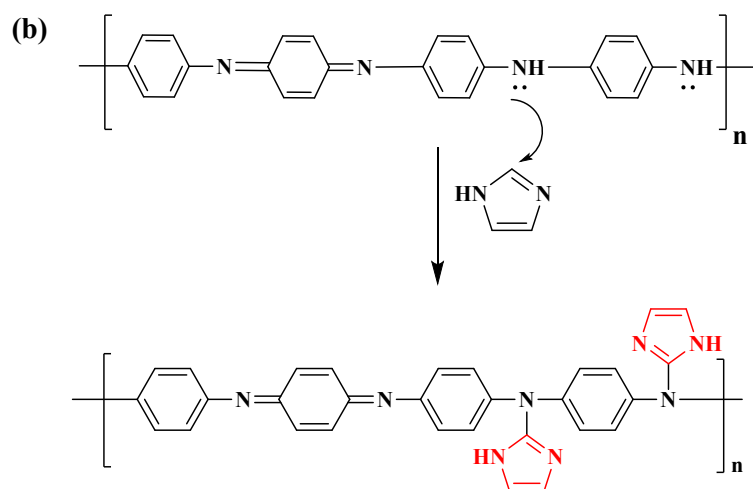

**Scheme S1:** (a) Mechanism of chemical oxidative polymerization of aniline to polyaniline  
 (b) PANI to PANI-Imidazole

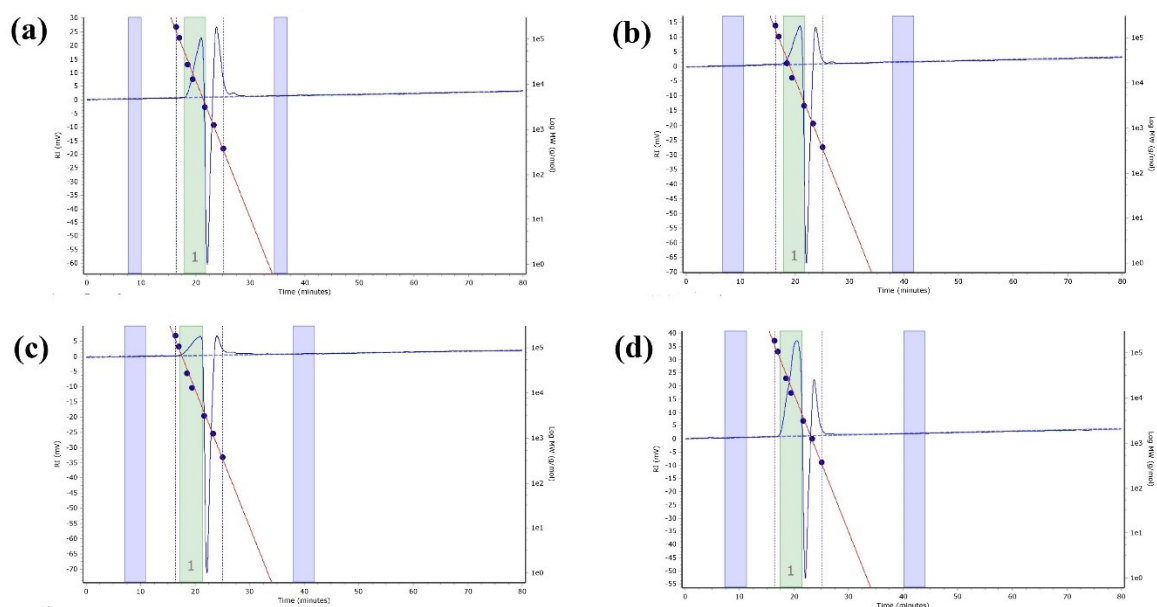

**Figure S2:** GPC graph of (a) PANI (b) PANI-Imidazole (1:1) (c) PANI-Imidazole (1:2) (d) PANI-Imidazole (2:1) copolymers
